# Supplementary material
Source: PubMed Central journal article supplement (PMC4066474)
Supplement: 1404639111_pnas.201404639SI.pdf [file 1404639111_pnas.201404639SI.pdf]

# Supporting Information

Hunter et al. 10.1073/pnas.1404639111

## SI Methods

**Protein Expression and Purification.** A construct encoding codon-optimized N-terminal His-tobacco etch virus (TEV)-G12C V-Kir2.1 Kirsten rat sarcoma viral oncogene homolog (K-Ras) in the pJExpress vector (DNA2.0) was synthesized and used to transform BL21(DE3) cells. Cells were grown in Luria broth (LB) to OD 600 0.7 and induced with 250 mM isopropyl  $\beta$ -D-1-thiogalactopyranoside (IPTG) for 16 h at 16 °C. Cells were pelleted and resuspended in lysis buffer [20 mM sodium phosphate (pH 8.0), 500 mM NaCl, 10 mM imidazole, 1 mM 2-mercaptoethanol (BME), 5% (vol/vol) glycerol] containing PMSF, benzamide, and 1 mg/mL lysozyme. Lysates were flash-frozen and stored at  $-80$  °C until use.

Protein was purified over an IMAC cartridge (BioRad) following standard Ni-affinity protocols and desalted into 1 $\times$  crystallization buffer [20 mM Hepes (pH 8.0), 150 mM NaCl, 5 mM MgCl<sub>2</sub>, 0.5 mM DTT]. The N-terminal His tag was cleaved by overnight digestion with a 1:5 ratio of TEV protease at 4 °C, and the TEV and Tag were removed by reverse purification over an IMAC cartridge. Protein was concentrated to 30–40 mg/mL in a 10-kDa cutoff Amicon filter (Millipore), aliquoted, and then flash-frozen and stored under liquid nitrogen. Yields were  $\sim$ 15 mg of purified K-Ras per liter of culture.

A WT expression construct was obtained by site-directed mutagenesis of the G12C construct using GenArt site-directed mutagenesis (Life Technologies) following the manufacturer's protocol. Protein was expressed and purified in the same manner as outlined for G12C K-Ras protein.

**Liquid Chromatography-Electrospray Ionization-MS Analysis of Intact K-Ras G12C.** Labeling and liquid chromatography-electrospray ionization-MS analysis of G12C K-Ras by SML-8-73-1 (SML) for crystallography were performed as described previously (1). Briefly, a solution of G12C K-Ras (1 mg/mL) was mixed with a 10-fold molar excess of compound and incubated at 37 °C for 2 h. The percentage of labeling was determined to be greater than 95% by intact MS analysis. Mass spectra were deconvoluted using MagTran software (version 1.03b2) (2).

**X-Ray Crystallography.** GDP-bound G12C and WT K-Ras protein crystals were obtained from hanging drop vapor diffusion against a well solution containing 0.2 M sodium acetate, 0.1 M Tris (pH 8.5), and 26% (wt/vol) PEG 3,350 at 20 °C. Crystals appeared in about 1 wk, and were between 100 and 200  $\mu$ m in size. Crystals of SML-labeled G12C K-Ras were obtained through sitting-drop vapor diffusion against a well solution containing 0.2 M MMT buffer (Malic acid, 2-ethanesulfonic acid, Tris buffer) (pH 4.0) and 28% (wt/vol) PEG 6,000 at 4 °C with microseeding, and grew to about 10  $\times$  20  $\mu$ m in size. Crystals were cryoprotected with 10% (vol/vol) glycerol.

X-ray diffraction data were collected at the Advanced Photon Source beamline 19-ID. Images were processed, integrated, and scaled with HKL-2000/3000 packages (HKL Research Inc.) (3). Molecular replacement and model refinement were performed using Phenix and CCP4 software with 4EPV as the initial search model (4, 5). Final structures were submitted to the Research Collaboratory for Structural Bioinformatics Protein Data Bank under ID codes 4OBE, 4LDJ, and 4NMM. Collection and refinement statistics of the final structures are listed in Table S1. Images were prepared using PyMOL, version 1.5.0.4 (Schrödinger, LLC).

**Chemosensor [7-Diethylamino-3-(4-Maleimidophenyl)-4-Methylcoumarin] Assay.** G12C or WT K-Ras protein was diluted to 0.25 mg/mL (15  $\mu$ M) in buffer containing 20 mM Tris (pH 7.5), 50 mM NaCl,

and no additional magnesium. SML was added to a concentration of 150  $\mu$ M, and GTP and GDP were added to a concentration of 1.5 mM each in the respective samples. Samples were incubated at 37 °C for the indicated length of time. For each time point, 27  $\mu$ L of sample was mixed with 3  $\mu$ L of 7-diethylamino-3-(4-maleimidophenyl)-4-methylcoumarin dissolved in DMSO (100  $\mu$ M final concentration) in a black 384-well plate and fluorescence was read at 384/470 nm. The assay was run in triplicate, and normalized data were fit to a one-phase decay nonlinear regression curve in GraphPad Prism.

**Sequence Conservation Analysis.** Amino acid sequences of Ras family proteins were obtained from the National Center for Biotechnology Information Protein Data Bank (PDB) and aligned using the multiple alignment server, Clustal-Omega (v.1.2.0). These files were submitted to the ConSurf server to generate relative conservation scores for each amino acid position using the Bayesian calculation method (6). Residues with the potential to interact with SML or switch II pocket (SIIP) compound 9 (7) (within 4 Å) and that were included in calculation of the conservation score were residues 11–18 [guanine nucleotide (GN)-binding pocket 1], 28–34 (GN-binding pocket 2), 58–59 (GN-binding pocket 3), 116–120 (GN-binding pocket 4), and 145–147 (GN-binding pocket 5), as well as residues 8–12 (switch II pocket 1S), 60–63 (switch II pocket 2S), 68–72 (switch II pocket 3S), and 96–100 (switch II pocket 4S), respectively. Residues included in the calculation of the kinase ATP binding site conservation score were residues 376–385, 400–402, 432, 447–451, 455, 501, and 511 (based on the structure sequence of PDB ID code 4FL1).

To color-code by conservation score, the ConSurf algorithm binned the continuous conservation scores into nine discrete groups ranging from highly conserved (9) to variable (1). Images of 3D structures color-coded by binned conservation score were generated using the PyMOL Molecular Graphics System. A Ras family dendrogram was generated using the Interactive Tree of Life (iTOL) online phylogenetic display tool (8, 9) with the Clustal-Omega-generated alignment and phylogenetic tree files as inputs.

**SML MS-Based Chemical Profiling.** MIA PaCa-2 cells were cultured in DMEM with 10% (vol/vol) FBS and 0.5% penicillin/streptomycin, harvested, and flash-frozen as a cell pellet. Cells were lysed, treated, and analyzed by MS according to previously reported methods at ActivX Biosciences, Inc., with minor modifications (10, 11, 12). Briefly, the cell pellets were lysed by sonication in lysis buffer [50 mM Hepes (pH 7.5), 150 mM NaCl, 0.1% Triton X-100, phosphatase inhibitors (mixture II AG Scientific no. P-1518)]. After lysis, the samples were cleared by centrifugation, the supernatant was gel-filtered using the BioRad 10DG columns, and the eluate was collected. The protein concentration was determined using a BCA Protein Assay Kit (Thermo Scientific), and adjusted to 5 mg/mL.

Lysates were then treated with compound (100  $\mu$ M) or an equivalent volume of DMSO for 15 min. EDTA was added to a final concentration of 5 mM, followed by a desthiobiotin-GTP-acylphosphate probe (GTP probe) to a final concentration of 20  $\mu$ M. One minute after addition of the probe, MgCl<sub>2</sub> was added to a final concentration of 20 mM, and the samples were incubated for an additional 10 min. Duplicate control and treated sample lysates were used for statistical analysis. The percentage of change in the MS signal was reported as statistically significant if the Student *t* test score was  $<0.04$ .

- Lim SM, et al. (2014) Therapeutic targeting of oncogenic K-Ras by a covalent catalytic site inhibitor. *Angew Chem Int Ed Engl* 53(1):199–204.
- Zhang Z, Marshall AG (1998) A universal algorithm for fast and automated charge state deconvolution of electrospray mass-to-charge ratio spectra. *J Am Soc Mass Spectrom* 9(3):225–233.
- Otwinowski Z, Minor W (1997) Processing of X-ray diffraction data collected in oscillation mode. *Methods Enzymol* 276:307–326.
- Adams PD, et al. (2010) PHENIX: A comprehensive Python-based system for macromolecular structure solution. *Acta Crystallogr D Biol Crystallogr* 66(Pt 2):213–221.
- Winn MD, et al. (2011) Overview of the CCP4 suite and current developments. *Acta Crystallogr D Biol Crystallogr* 67(Pt 4):235–242.
- Landau M, et al. (2005) ConSurf 2005: The projection of evolutionary conservation scores of residues on protein structures. *Nucleic Acids Res* 33(Web Server issue):W299–W302.
- Ostrem JM, Peters U, Sos ML, Wells JA, Shokat KM (2013) K-Ras(G12C) inhibitors allosterically control GTP affinity and effector interactions. *Nature* 503(7477):548–551.
- Letunic I, Bork P (2011) Interactive Tree Of Life v2: Online annotation and display of phylogenetic trees made easy. *Nucleic Acids Res* 39(Web Server issue):W475–W478.
- Letunic I, Bork P (2007) Interactive Tree Of Life (iTOL): An online tool for phylogenetic tree display and annotation. *Bioinformatics* 23(1):127–128.
- Patricelli MP, et al. (2007) Functional interrogation of the kinase using nucleotide acyl phosphates. *Biochemistry* 46(2):350–358.
- Patricelli MP, et al. (2011) In situ kinase profiling reveals functionally relevant properties of native kinases. *Chem Biol* 18(6):699–710.
- Okerberg ES, et al. (2005) High-resolution functional proteomics by active-site peptide profiling. *Proc Natl Acad Sci USA* 102(14):4996–5001.

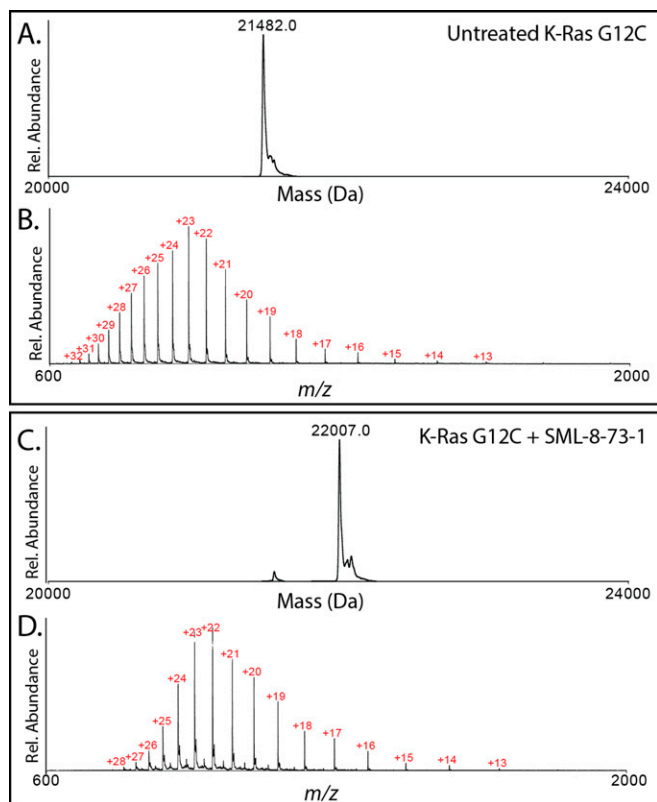

**Fig. S1.** Near-complete K-Ras G12C labeling by SML. Zero-charge mass spectra (A and C) and mass spectra (B and D) derived from analysis of untreated K-Ras G12C (A and B) or K-Ras G12C treated for 2 h with a 10-fold excess of SML (C and D). Treatment produces a shift in mass consistent with covalent labeling by SML (compound-HCl). Rel., relative.

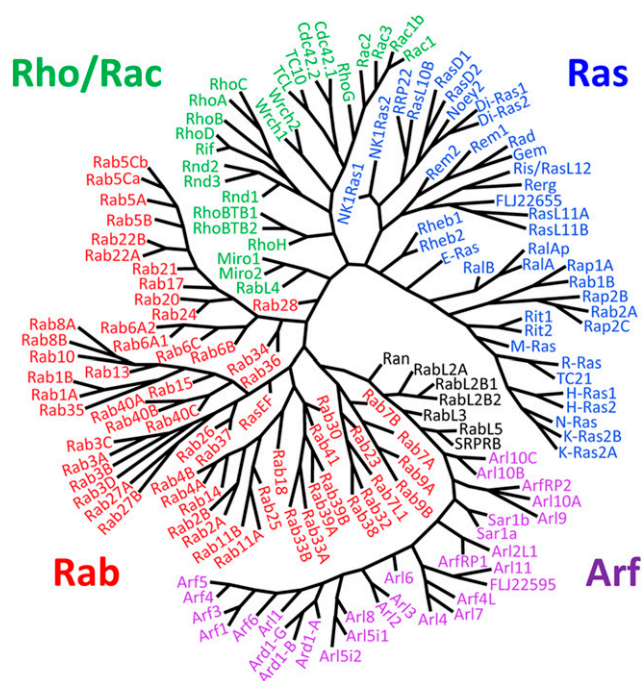

**Fig. S2.** Ras family dendrogram. The Ras superfamily consists of 160 members, which can be subdivided into the Ras, ADP ribosylation factor (Arf), Ras-related proteins in brain (Rab), Ras-homologous (Rho/Rac), and Ras-related nuclear protein (Ran) subfamilies. Clustering analysis was performed on amino acid sequences obtained from the National Center for Biotechnology Information PDB using the Clustal-Omega multiple sequence alignment tool.

**Table S1.** Data collection and refinement statistics

|                             | WT (PDB ID code 4OBE) | G12C (PDB ID code 4LDJ)                       | SML (PDB ID code 4NMM)                        |
|-----------------------------|-----------------------|-----------------------------------------------|-----------------------------------------------|
| <b>Data collection</b>      |                       |                                               |                                               |
| Source                      | APS 19-1D             | APS 19-1D                                     | APS 19-1D                                     |
| Wavelength, Å               | 0.97926               | 0.97918                                       | 0.97921                                       |
| Space group                 | C2                    | P2 <sub>1</sub> 2 <sub>1</sub> 2 <sub>1</sub> | P2 <sub>1</sub> 2 <sub>1</sub> 2 <sub>1</sub> |
| Unit cell                   |                       |                                               |                                               |
| a, b, c; Å                  | 66.2, 42.1, 114.4     | 39.1, 40.7, 91.4                              | 39.1, 42.0, 91.2                              |
| α, β, γ; °                  | 90, 105.3, 90         | 90, 90, 90                                    | 90, 90, 90                                    |
| Resolution, Å               | 50–1.24               | 50–1.15                                       | 50–1.89                                       |
| Unique reflections          | 81,203                | 52,661                                        | 12,363                                        |
| Redundancy*                 | 4.3 (3.2)             | 7.0 (3.0)                                     | 5.8 (5.1)                                     |
| Completeness, %             | 100 (94.1)            | 99.2 (94.8)                                   | 99.8 (67.8)                                   |
| R-merge                     | 0.049 (0.395)         | 0.075 (0.317)                                 | 0.126 (0.883)                                 |
| <I/σ>                       | 33.2 (2.07)           | 9.6 (2.48)                                    | 14.47 (2.04)                                  |
| Wilson B-factor             | 11.5                  | 9.66                                          | 23.3                                          |
| <b>Refinement</b>           |                       |                                               |                                               |
| Resolution                  | 22.1–1.24             | 20.7–1.15                                     | 45.6–1.89                                     |
| Reflections used            | 77,093                | 50,614                                        | 11,695                                        |
| Reflections for R-free      | 4074                  | 1977                                          | 615                                           |
| Nonhydrogen atoms           | 3,093                 | 1,666                                         | 1,482                                         |
| Protein                     | 2,680                 | 1,386                                         | 1,357                                         |
| Water                       | 355                   | 280                                           | 125                                           |
| R-work                      | 0.157                 | 0.136                                         | 0.184                                         |
| R-free                      | 0.169                 | 0.158                                         | 0.244                                         |
| <b>rmsd</b>                 |                       |                                               |                                               |
| Bond lengths, Å             | 0.011                 | 0.015                                         | 0.016                                         |
| Bond angles, °              | 1.3                   | 1.7                                           | 1.4                                           |
| Average B-factor            | 17.7                  | 12.9                                          | 26.0                                          |
| <b>Ramachandran plot, %</b> |                       |                                               |                                               |
| Favored/allowed/disallowed  | 98.8/1.2/0.0          | 94.2/5.8/0.0                                  | 99.4/0.6/0.0                                  |
| MolProbity score            | 0.82 (100%)           | 0.82 (100%)                                   | 1.04 (100%)                                   |

APS, Advanced Photon Source.

\*Numbers in parentheses correspond to the last resolution shell.

**Table S2. Complete chemical proteomics profiling results**

| Family                        | GTPase                                                                            | Labeling site          | Probe inhibition, % |       |
|-------------------------------|-----------------------------------------------------------------------------------|------------------------|---------------------|-------|
| Small GTPase, Rho             | CDC42                                                                             | GTPase domain          | 16.6                |       |
|                               | CDC42                                                                             | GTPase domain          | -0.7                |       |
|                               | CDC42                                                                             | GTP P site             | -1.1                |       |
|                               | RhoA, RhoC                                                                        | GTPase domain          | 3.7                 |       |
|                               | RhoA, RhoC                                                                        | GTP P site             | -30.1               |       |
|                               | RHOG                                                                              | GTP P site             | 20.6                |       |
|                               | RHOG                                                                              | GTPase domain          | 12.5                |       |
| Small GTPase, Ras             | HRAS, KRAS, NRAS                                                                  | GTP P site             | -20.6               |       |
|                               | KRAS G12C                                                                         | GTP P site             | 82.9                |       |
|                               | RABL4                                                                             | GTP P site             | 4.9                 |       |
|                               | RAP1A, RAP1B                                                                      | GTP P site             | 2.7                 |       |
|                               | RAP1A, RAP1B                                                                      | GTPase domain          | -2.4                |       |
|                               | RAP1A, RAP1B                                                                      | GTP P site             | -6.9                |       |
|                               | RAP2B                                                                             | GTP P site             | 5.4                 |       |
| Small GTPase, Ran             | RAN                                                                               | GTPase domain          | 8.7                 |       |
|                               | RAN                                                                               | GTPase domain          | 2.5                 |       |
|                               | RAN                                                                               | GTP P site             | -5.2                |       |
| Small GTPase, Rab             | RAB11A, RAB11B                                                                    | GTP P site             | -63.6               |       |
|                               | RAB13                                                                             | GTP P site             | -38.3               |       |
|                               | RAB14                                                                             | GTP P site             | 6.3                 |       |
|                               | RAB18                                                                             | GTPase domain          | 11.4                |       |
|                               | RAB18                                                                             | GTP P site             | -20.1               |       |
|                               | RAB1A, RAB1B, RAB1C                                                               | GTP P site             | -108.7              |       |
|                               | RAB1A, RAB1B, RAB1C, RAB3A,<br>RAB3C, RAB3D, RAB8A, RAB8B,<br>RAB9B, RAB10, RAB14 | GTPase domain          | -0.9                |       |
|                               | RAB21                                                                             | GTP P site             | 11.5                |       |
|                               | RAB22A                                                                            | GTP P site             | 19.3                |       |
|                               | RAB27A                                                                            | GTP P site             | -49.9               |       |
|                               | RAB27B                                                                            | GTP P site             | 20.9                |       |
|                               | RAB28                                                                             | GTP P site             | 14                  |       |
|                               | RAB2A, RAB2B                                                                      | GTP P site             | -37                 |       |
|                               | RAB31                                                                             | GTP P site             | -13.5               |       |
|                               | RAB32                                                                             | GTP P site             | 20.4                |       |
|                               | RAB33B                                                                            | GTPase domain          | -1.1                |       |
|                               | RAB33B                                                                            | GTP P site             | -26.1               |       |
|                               | RAB35                                                                             | GTP P site             | 2.4                 |       |
|                               | RAB3A                                                                             | GTP P site             | -24.1               |       |
|                               | RAB3B, RAB3C                                                                      | GTP P site             | 2.4                 |       |
|                               | RAB3D                                                                             | GTP P site             | -4.3                |       |
|                               | RAB43                                                                             | GTP P site             | -19.7               |       |
|                               | RAB4A                                                                             | GTP P site             | 6.4                 |       |
|                               | RAB4B                                                                             | GTP P site             | -38.1               |       |
|                               | RAB5A, RAB5B, RAB5C                                                               | GTP P site             | -11.5               |       |
|                               | RAB6A, RAB6B                                                                      | GTP P site             | 16.8                |       |
|                               | RAB7A                                                                             | GTP P site             | -2.8                |       |
|                               | RAB7A                                                                             | GTPase domain          | -25.4               |       |
|                               | RAB7L                                                                             | GTP P site             | -14.7               |       |
|                               | RAB8A, RAB10                                                                      | GTP P site             | 30                  |       |
|                               | RAB8B                                                                             | GTP P site             | -5.1                |       |
|                               | RABL2A, RABL2B                                                                    | GTP P site             | 5.6                 |       |
|                               | RABL3                                                                             | GTP P site             | -18.2               |       |
|                               | Small GTPase, Arf                                                                 | ARF1, ARF3, ARF4, ARF5 | GTP P site          | 3.5   |
|                               |                                                                                   | ARF6                   | GTP P site          | -14   |
|                               |                                                                                   | ARL1                   | GTP P site          | 21.1  |
|                               |                                                                                   | ARL11                  | GTPase domain       | 20.1  |
|                               |                                                                                   | ARL2                   | GTP P site          | 0     |
|                               |                                                                                   | ARL3                   | GTP P site          | 65.1  |
|                               | Small GTPase, SAR1                                                                | SAR1A, SAR1B           | GTP P site          | -51.6 |
| MMR1/HSR1 GTP binding         | NOG2                                                                              | GTP P site             | 15.4                |       |
|                               | NOG2                                                                              | GTPase domain          | -4.3                |       |
| Mitochondrial Rho GTPase      | RHOT2                                                                             | GTP P site domain 2    | 0.2                 |       |
| IF-2                          | IF2P                                                                              | GTP P site             | 27.9                |       |
| GTPBP1 GTP-binding protein    | GTPBP1                                                                            | GTP P site             | 12.6                |       |
|                               | GTPBP2                                                                            | GTP P site             | -4.5                |       |
| GTP-binding elongation factor | EEF1A1, EEF1A2, EEF1A3                                                            | GTP P site             | 15.3                |       |

**Table S2. Cont.**

| Family                                            | GTPase                                                                   | Labeling site           | Probe inhibition, % |
|---------------------------------------------------|--------------------------------------------------------------------------|-------------------------|---------------------|
|                                                   | EFTUD1                                                                   | GTP P site              | 73.3                |
|                                                   | EIF2S3, EIF2S3L                                                          | GTP P site              | -7                  |
|                                                   | GSPT1                                                                    | GTP P site              | 18.9                |
|                                                   | GSPT2                                                                    | GTP P site              | 6.9                 |
|                                                   | GUF1                                                                     | GTP P site              | 72.6                |
|                                                   | HBS1L                                                                    | GTP P site              | 20.9                |
|                                                   | SELB                                                                     | GTP P site              | 10.1                |
| GTP1/OBG                                          | DRG1                                                                     | GTP P site              | 25.7                |
|                                                   | DRG1                                                                     | GTPase domain           | 17.5                |
|                                                   | GTPBP10                                                                  | GTP P site              | 1.6                 |
| G-alpha                                           | GNA11, GNA14, GNAQ                                                       | GTP P site              | -14.8               |
|                                                   | GNAI1, GNAI2, GNAI3, GNAL,<br>GNAO, GNAS1, GNAS2, GNAT1,<br>GNAT2, GNAT3 | GTP P site              | -23.9               |
|                                                   | GNAI2-like                                                               | GTP P site              | -23                 |
| Eukaryotic initiation<br>factor 4E                | eIF4                                                                     | 7mG mRNA cap<br>binding | 3.1                 |
|                                                   | eIF4                                                                     | 7mG mRNA cap binding    | -3.5                |
| Era/mnmE GTP-binding<br>protein                   | ERAL1                                                                    | GTP P site              | -12.9               |
|                                                   | GTPBP3                                                                   | GTP P site              | 1.7                 |
| eIF-2B/eIF-5                                      | EIF5                                                                     | GTPase domain           | 13.6                |
| Dynamin                                           | OPA-1                                                                    | GTP P site              | 15.8                |
| DNA-dependent protein<br>kinase catalytic subunit | DNAPK                                                                    | ATP                     | -5.4                |
|                                                   | DNAPK                                                                    | ATP                     | -10.6               |
| WD repeat G protein beta                          | GNB2L1                                                                   | G beta                  | 6.1                 |
|                                                   | GNB2L1                                                                   | G beta                  | -11.8               |

GTP-binding proteins that exhibited statistically significant inhibition of GDP-desthiobiotin labeling by SML ( $P < 0.04$  by Student  $t$  test) are highlighted in orange or red. All others (green) show no statistically significant change.

**Table S3. GTPases containing a cysteine residue near the GN-binding site**

| Switch II pocket       |                         |                         |                          | GN-binding pocket      |                        |                        |                          |                          |
|------------------------|-------------------------|-------------------------|--------------------------|------------------------|------------------------|------------------------|--------------------------|--------------------------|
| 1S<br>Residues<br>8–12 | 2S<br>Residues<br>60–63 | 3S<br>Residues<br>68–72 | 4S<br>Residues<br>96–100 | 1<br>Residues<br>11–18 | 2<br>Residues<br>28–34 | 3<br>Residues<br>58–59 | 4<br>Residues<br>116–120 | 5<br>Residues<br>145–147 |
| ArfRP2                 |                         | Arl1                    | Rab33A                   | Arl4                   | Gem                    | FLJ22655               | Di-Ras1                  | Arf1                     |
| Arl6                   |                         | Arl10B                  | Rab33B                   | Cdc42 i.1              | NKIRas1                | RabL5                  | E-Ras                    | Arf3                     |
| NKIRas1                |                         | Arl10C                  | RabL5                    | Cdc42 i.2              | Rab14                  |                        | H-Ras i.1                | Arf4                     |
| NKIRas2                |                         | E-Ras                   |                          | Rab10                  | Rab39A                 |                        | H-Ras i.2                | Arf5                     |
| RabL2A                 |                         | FLJ22595                |                          | Rab13                  | RasL10B                |                        | K-Ras2A                  | Arf6                     |
| RabL2B                 |                         | Gem                     |                          | Rab14                  |                        |                        | K-Ras2B                  | Arl4                     |
| RabL2B                 |                         | NKIRas2                 |                          | Rab15                  |                        |                        | NKIRas2                  | Arl5 i.1                 |
| RabL5                  |                         | Rab17                   |                          | Rab1A                  |                        |                        | N-Ras                    | Arl5 i.2                 |
| SRPRB                  |                         | Rab20                   |                          | Rab1B                  |                        |                        | Rab10                    | Arf7                     |
|                        |                         | Rad                     |                          | Rab21                  |                        |                        | Rab13                    | Arf8                     |
|                        |                         | RasL10B                 |                          | Rab26                  |                        |                        | Rab1A                    | FLJ22595                 |
|                        |                         | RasL11A                 |                          | Rab2A                  |                        |                        | Rab22A                   | Rerg                     |
|                        |                         | RasL11B                 |                          | Rab2B                  |                        |                        | Rab22B                   | Ris/RasL12               |
|                        |                         | Rem1                    |                          | Rab30                  |                        |                        | Rab32                    |                          |
|                        |                         | Rem2                    |                          | Rab33A                 |                        |                        | Rab33A                   |                          |
|                        |                         | Ris/RasL12              |                          | Rab33B                 |                        |                        | Rab33B                   |                          |
|                        |                         | Rnd1                    |                          | Rab34                  |                        |                        | Rab38                    |                          |
|                        |                         | Wrch-1                  |                          | Rab39A                 |                        |                        | Rab39A                   |                          |
|                        |                         | Wrch-2                  |                          | Rab39B                 |                        |                        | Rab39B                   |                          |
|                        |                         |                         |                          | Rab41                  |                        |                        | Rab3A                    |                          |
|                        |                         |                         |                          | Rab4A                  |                        |                        | Rab3B                    |                          |
|                        |                         |                         |                          | Rab4B                  |                        |                        | Rab3C                    |                          |
|                        |                         |                         |                          | Rab8A                  |                        |                        | Rab3D                    |                          |
|                        |                         |                         |                          | Rab8B                  |                        |                        | Rab7L1                   |                          |
|                        |                         |                         |                          | RabL5                  |                        |                        | Rab8A                    |                          |
|                        |                         |                         |                          | Rac1                   |                        |                        | Rab8B                    |                          |
|                        |                         |                         |                          | Rac1b                  |                        |                        | Rap1A                    |                          |
|                        |                         |                         |                          | Rac2                   |                        |                        | Rap1B                    |                          |
|                        |                         |                         |                          | Rac3                   |                        |                        | RasD2                    |                          |
|                        |                         |                         |                          | Rheb2                  |                        |                        | RhoBTB1                  |                          |
|                        |                         |                         |                          | RhoA                   |                        |                        | RhoBTB2                  |                          |
|                        |                         |                         |                          | RhoB                   |                        |                        | RhoD                     |                          |
|                        |                         |                         |                          | RhoC                   |                        |                        | Rif                      |                          |
|                        |                         |                         |                          | RhoD                   |                        |                        | Rnd1                     |                          |
|                        |                         |                         |                          | RhoG                   |                        |                        | Rnd2                     |                          |
|                        |                         |                         |                          | Rif                    |                        |                        | Rnd3                     |                          |
|                        |                         |                         |                          | Rnd1                   |                        |                        |                          |                          |
|                        |                         |                         |                          | Rnd2                   |                        |                        |                          |                          |
|                        |                         |                         |                          | Rnd3                   |                        |                        |                          |                          |
|                        |                         |                         |                          | SRPRB                  |                        |                        |                          |                          |
|                        |                         |                         |                          | TC10                   |                        |                        |                          |                          |
|                        |                         |                         |                          | TCL                    |                        |                        |                          |                          |

Based on sequence alignments, numerous GTPases are predicted to have a cysteine within regions surrounding the GN-binding site as designated in this table.
